# Supplementary material
Source: Research Square preprint supplement (doi:10.21203/rs.3.rs-9759220/v1)
Supplement: Supplementary file 3 [file 30901133aee4a5a0ec904bc3.docx]

*Supplementary Figures.*

**Supplementary Fig. S1. GMM component-number evaluation metrics.** Gaussian mixture models with K = 2–10 components were fitted to the four-dimensional PCA feature space. BIC and AIC both showed an elbow at K = 4; K = 4 and K = 5 were therefore examined as candidate solutions. Additional clustering metrics are shown for reference, including Davies-Bouldin index, Silhouette coefficient, Calinski-Harabasz index, and mean adjusted Rand index across repeated runs. Silhouette and Calinski-Harabasz favored K = 2 and the Davies-Bouldin index favored K = 8, illustrating that purely geometric clustering metrics did not provide a biologically interpretable component-number choice for overlapping spike waveforms. Together with sensitivity analyses of waveform classification stability across PCA dimensionality, component number, and feature set (Figs. S2–S5), this supported K = 5 as the main descriptive solution.

**Supplementary Fig. S2. Sensitivity of spike response patterns to PCA dimensionality.** Host versus Non-host and Rutaceae versus Non-Rutaceae effect sizes (rank-biserial *r*) for each spike type are compared across GMM solutions derived from PCA spaces of varying dimensionality. The response directions of the primary spike types—Type 0, Type 3, and Type 4—are preserved regardless of PCA dimensionality, demonstrating that the main conclusions are robust to the choice of PCA dimension. Single asterisks (*) above bars indicate BH-FDR q < 0.05.

**Supplementary Fig. S3. Sensitivity of clustering to the number of GMM components K.** GMM clustering was performed for K = 3–7, and the response direction and statistical significance of each spike type were compared across conditions. The non-host-associated Type 0 response and the host-associated Type 4 direction were reproduced stably across K = 5–7. Type 1 and Type 3, however, both lost stable directionality at K ≥ 6: Type 1 reversed from host-preferring at K = 5 to non-host-preferring at K ≥ 6, and Type 3 reversed from non-host-preferring at K = 5 to host-preferring at K ≥ 6, indicating limited classification stability for these types. Asterisks (*) within heatmap cells indicate BH-FDR q < 0.05; effect sizes are shown in bold.

**Supplementary Fig. S4. Comparison of six-feature and three-feature spike classification.** Classification using three features (peak_v, trough_v, and symmetry only; omitting half_width, rise_slope, and fall_slope) is compared with the six-feature solution. (A) BIC and AIC across K = 2–8 for both feature sets; BIC recommended K = 4 for the three-feature solution. To isolate the effect of feature set, panels B–E were computed using PCA = 3 dimensions and K = 5 GMM components; note that the main analysis (Fig. 4) uses PCA = 4 dimensions for the six-feature solution. (B) Cross-tabulation of cluster assignments between the six-feature K = 5 and three-feature K = 5 solutions; adjusted Rand index ARI = 0.407. (C) Mean waveform templates for each cluster in the six-feature (upper) and three-feature (lower) solutions. (D) Feature distributions by cluster for the six-feature and three-feature solutions. (E) Heatmaps of mean firing rates by cluster and plant species; in the three-feature solution, the host-responsive cluster equivalent to Type 4 is fragmented across multiple components. These results show that all six features are necessary for stable resolution of the waveform-defined spike types.

**Supplementary Fig. S5. Functional validation of K selection across PCA dimension × K combinations.** Host versus Non-host effect sizes are compared for GMM solutions derived from multiple combinations of PCA dimensionality and number of components K. At K = 5, the bidirectional pattern—host-associated Type 4 directionality and robust non-host-associated Type 0 activity—is consistently recovered across PCA dimensions. Together with the BIC/AIC elbow criterion (Fig. S1), this supports K = 5 as a stable and biologically interpretable descriptive classification of spike types. Asterisks in spike-type labels indicate BH-FDR-corrected significance level (*** q < 0.001,**  q < 0.01, * q < 0.05).
