# Supplementary material
Source: Research Square preprint supplement (doi:10.21203/rs.3.rs-9759220/v1)

# Cluster Evaluation Metrics — PCA=4 dims

### BIC Score (Lower is better)

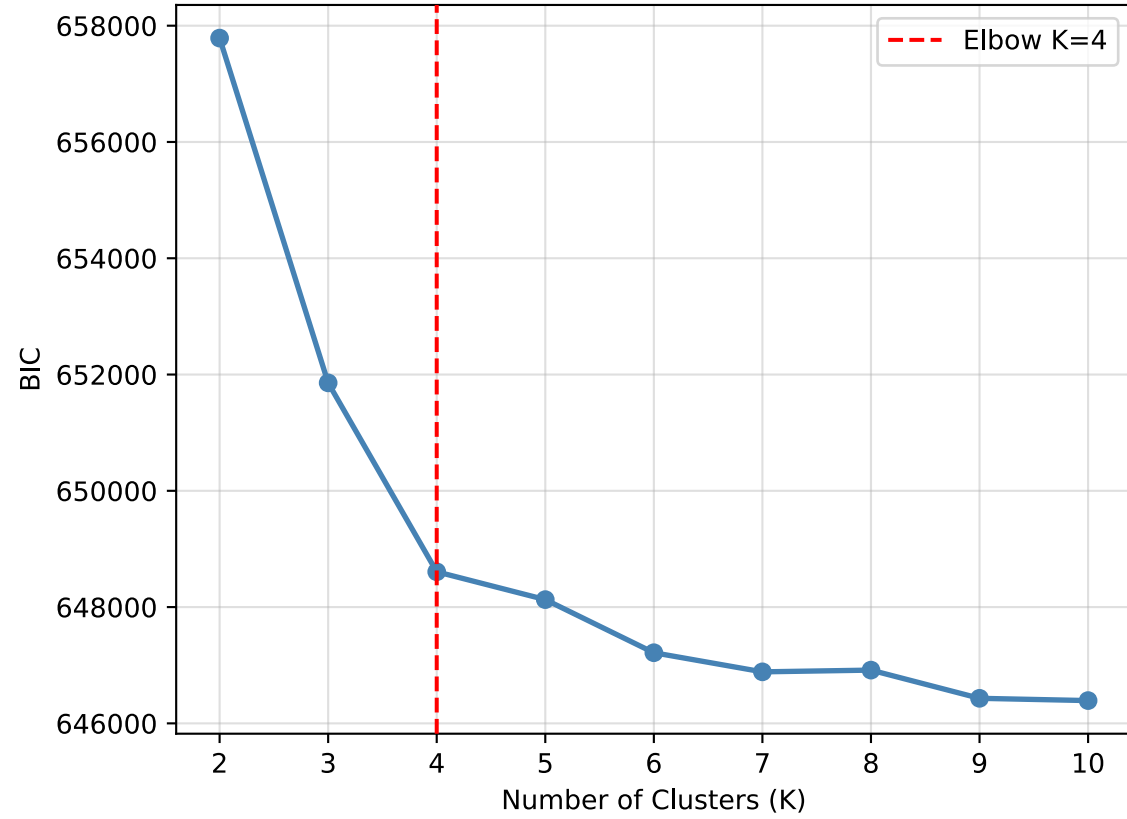

### AIC Score (Lower is better)

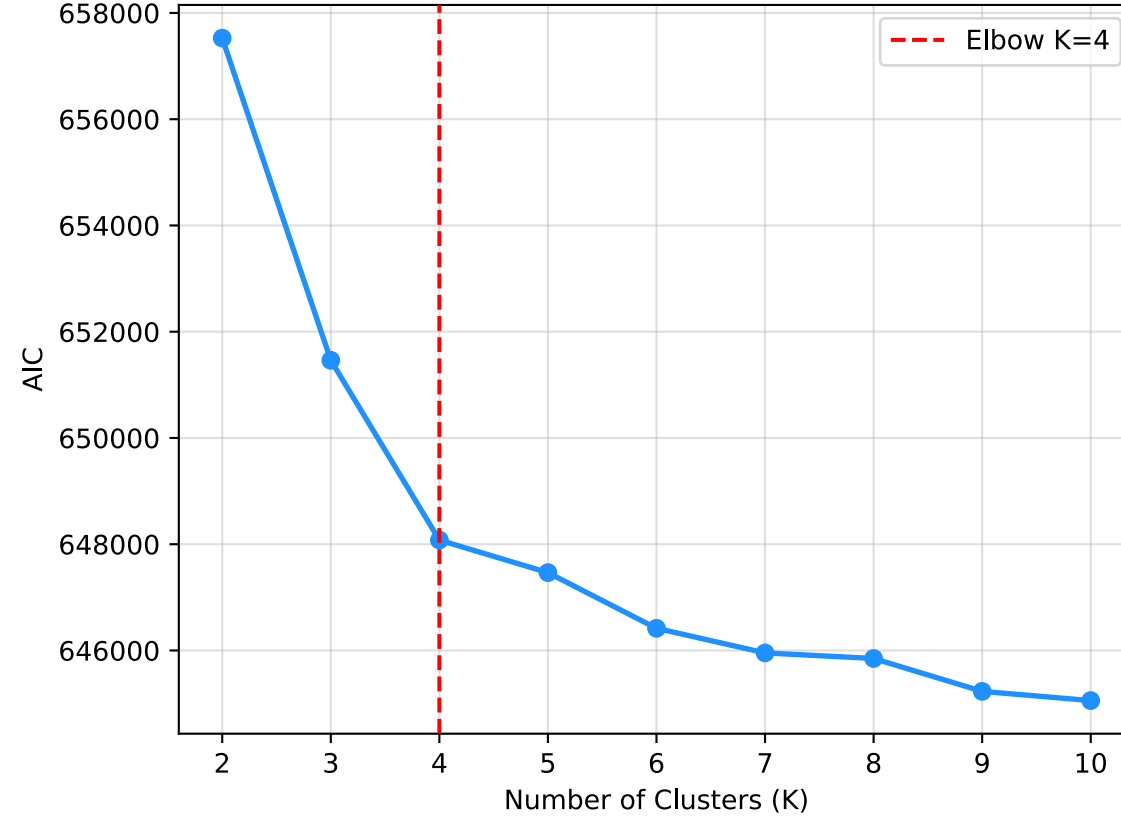

### Davies-Bouldin Index (Lower is better)

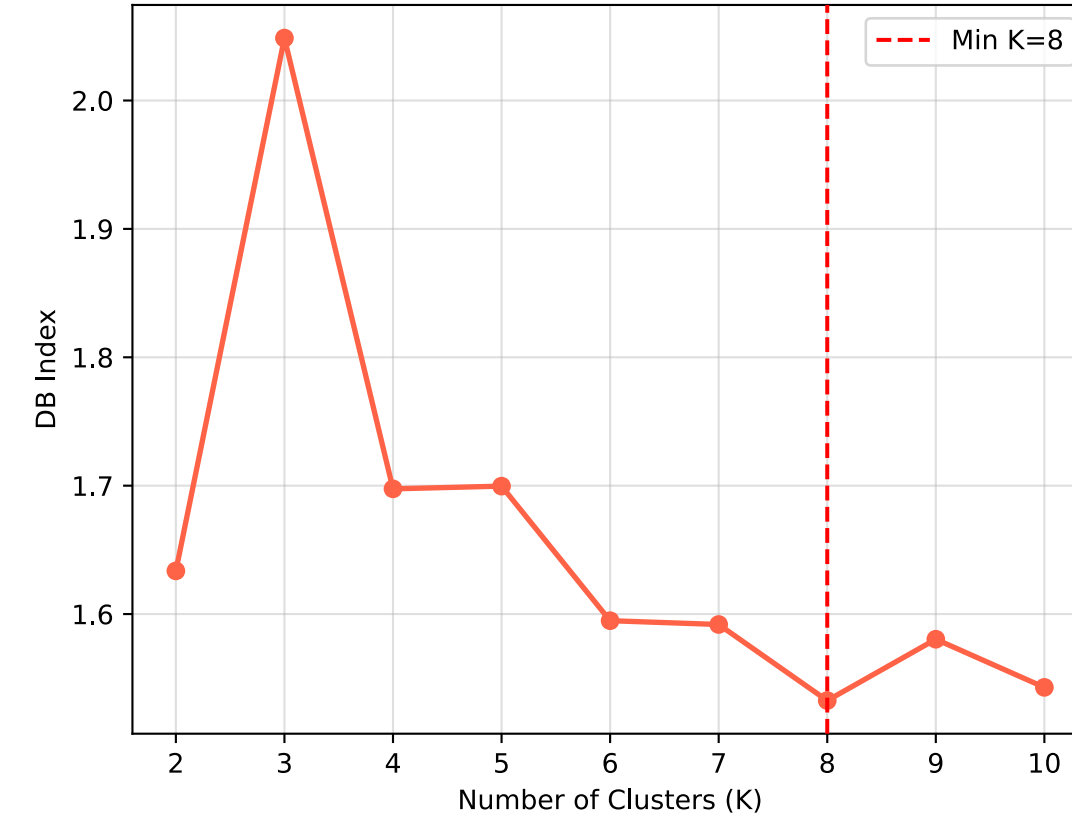

### Silhouette Score (Higher is better)

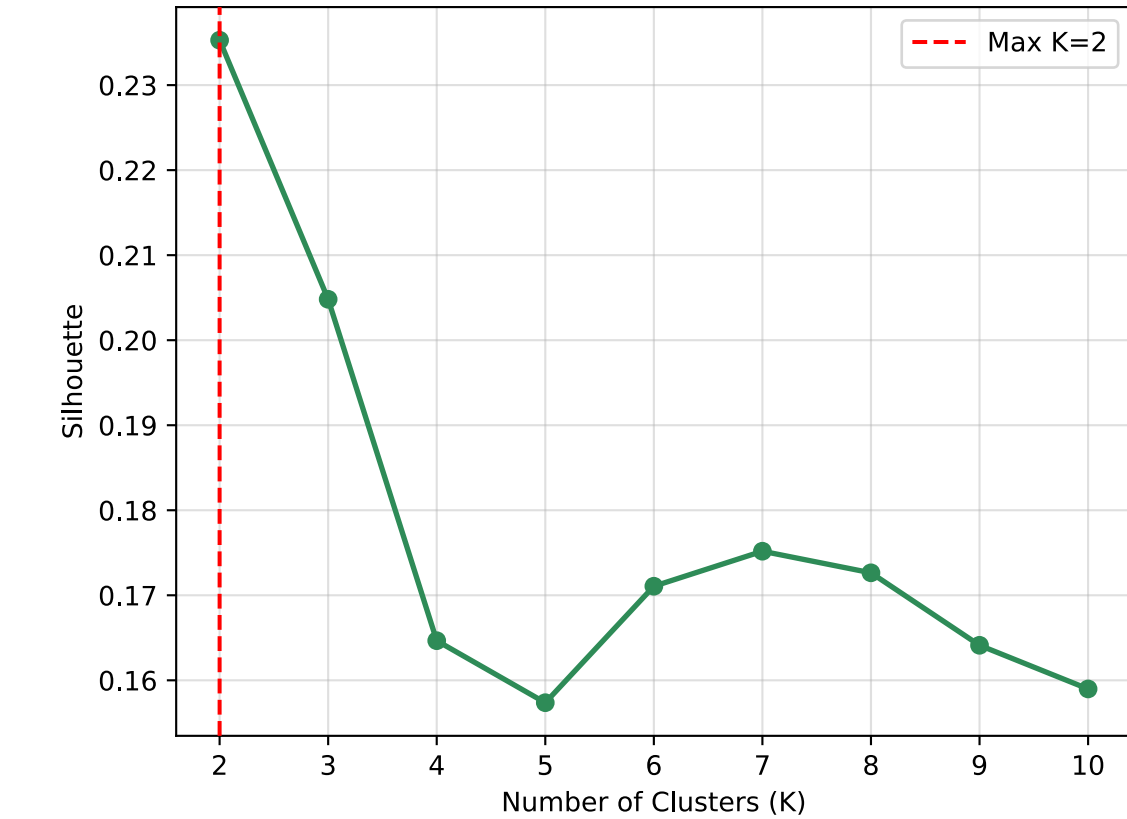

### Calinski-Harabasz Index (Higher is better)

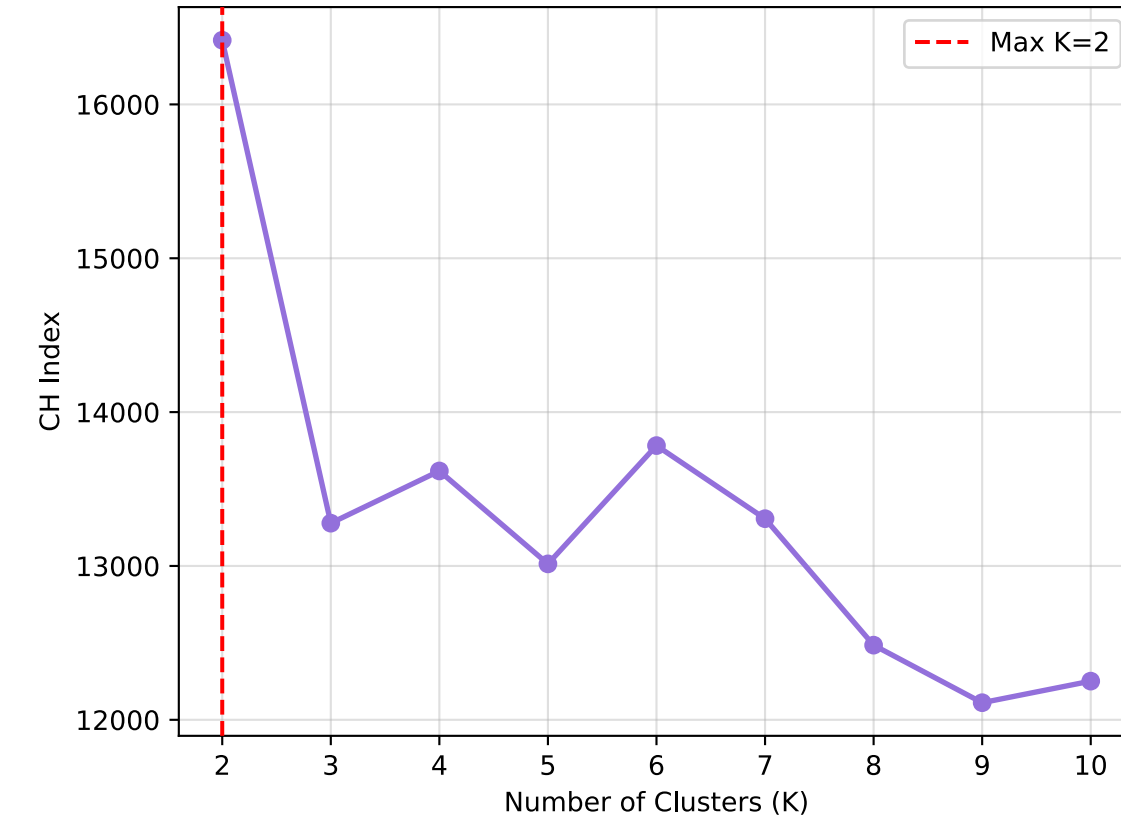

### Stability (ARI, 20 runs) (Higher is better)

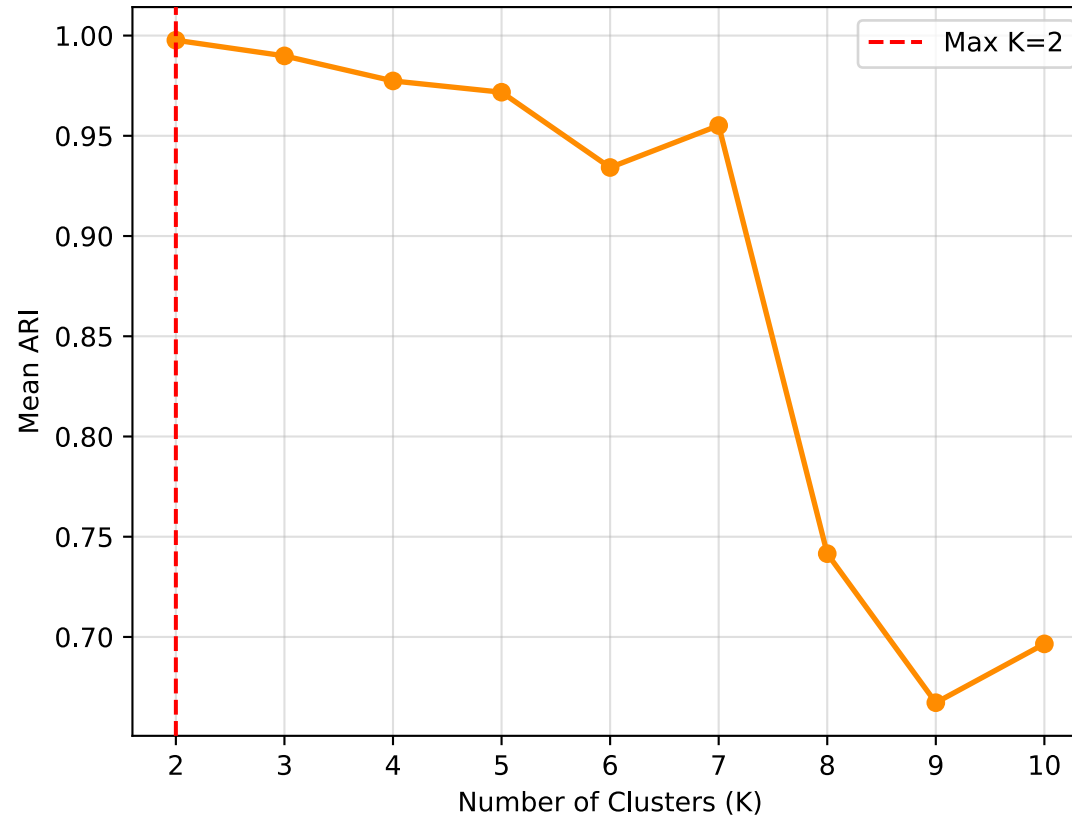

Supplement: Supplementary file 4 [file 534808ba8ab8f3d510eafbc6.pdf]
