# Supplementary material
Source: Research Square preprint supplement (doi:10.21203/rs.3.rs-9759220/v1)

**K Sensitivity Test: PCA=4, K=3-7**  
 (\* = BH-FDR  $q < 0.05$ , gold border = adopted K=5, bold = significant)

**Host vs Non-host**

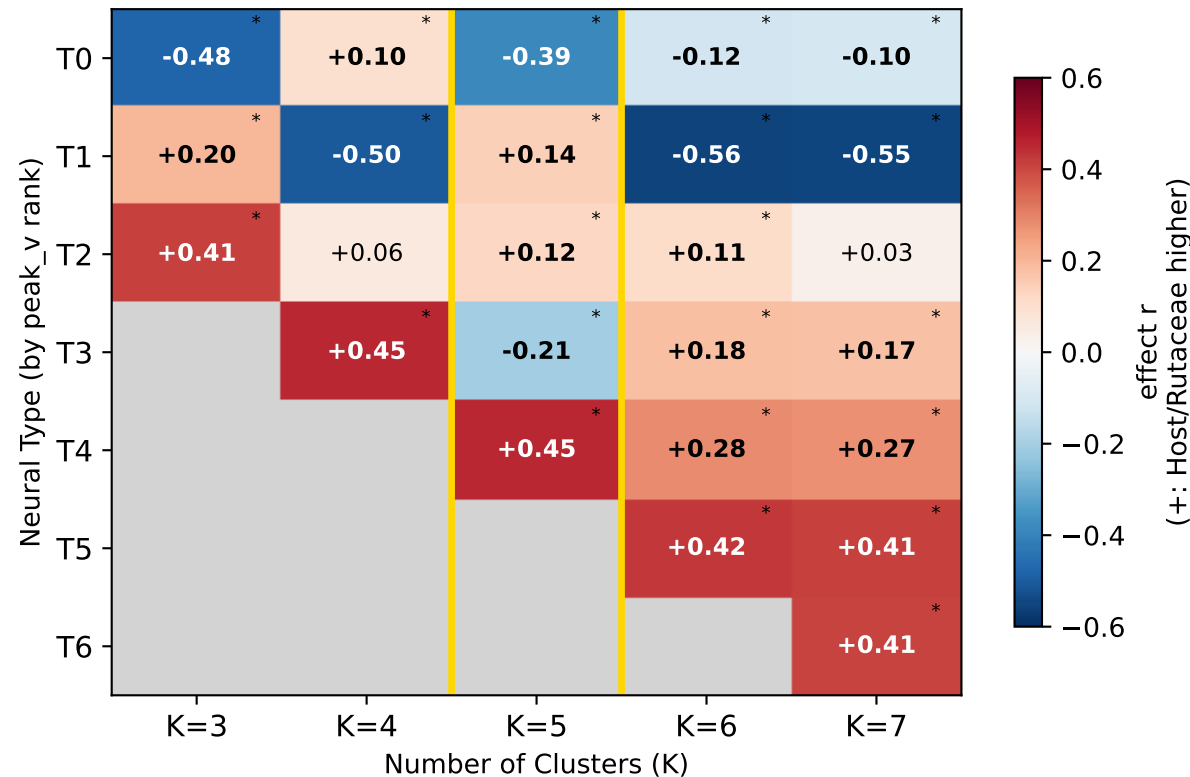

**Rutaceae vs Non-Rutaceae**

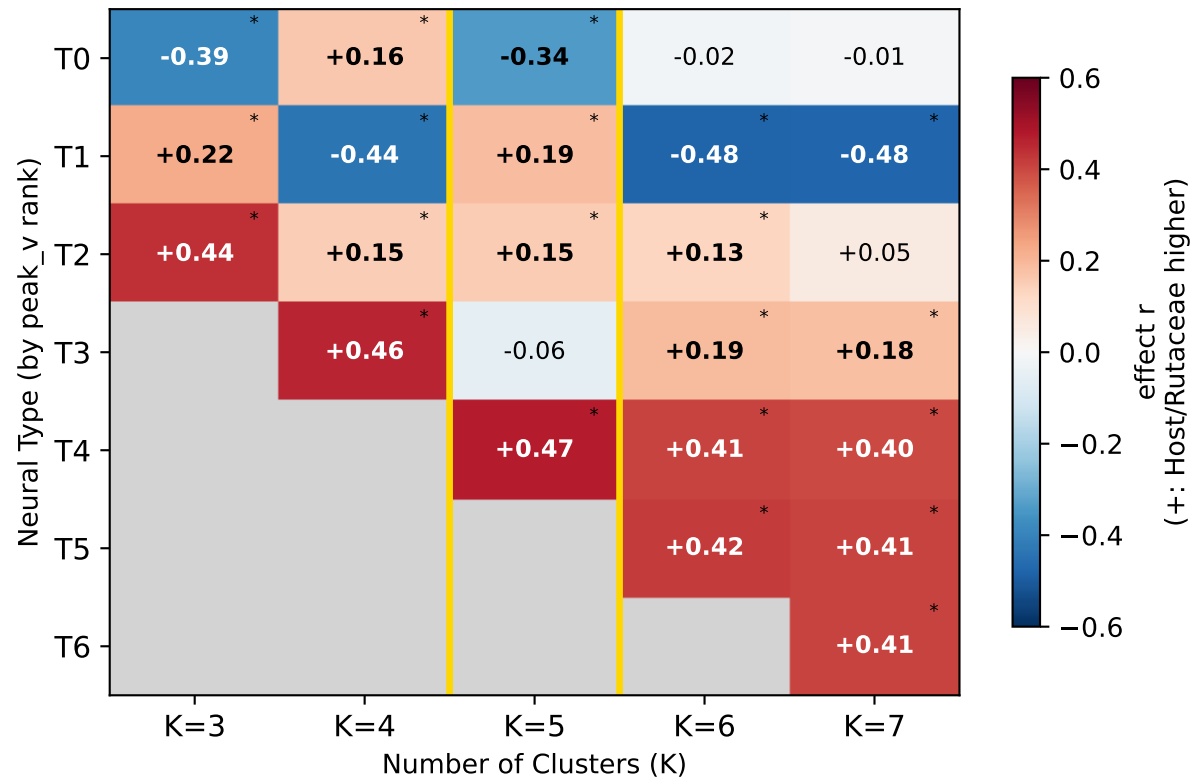

Supplement: Supplementary file 5 [file 5729bd1c5a25b792d144d728.pdf]
