# Supplementary material
Source: Research Square preprint supplement (doi:10.21203/rs.3.rs-9759220/v1)

# Feature Distributions per Neural Type: A vs B

## A — peak\_v

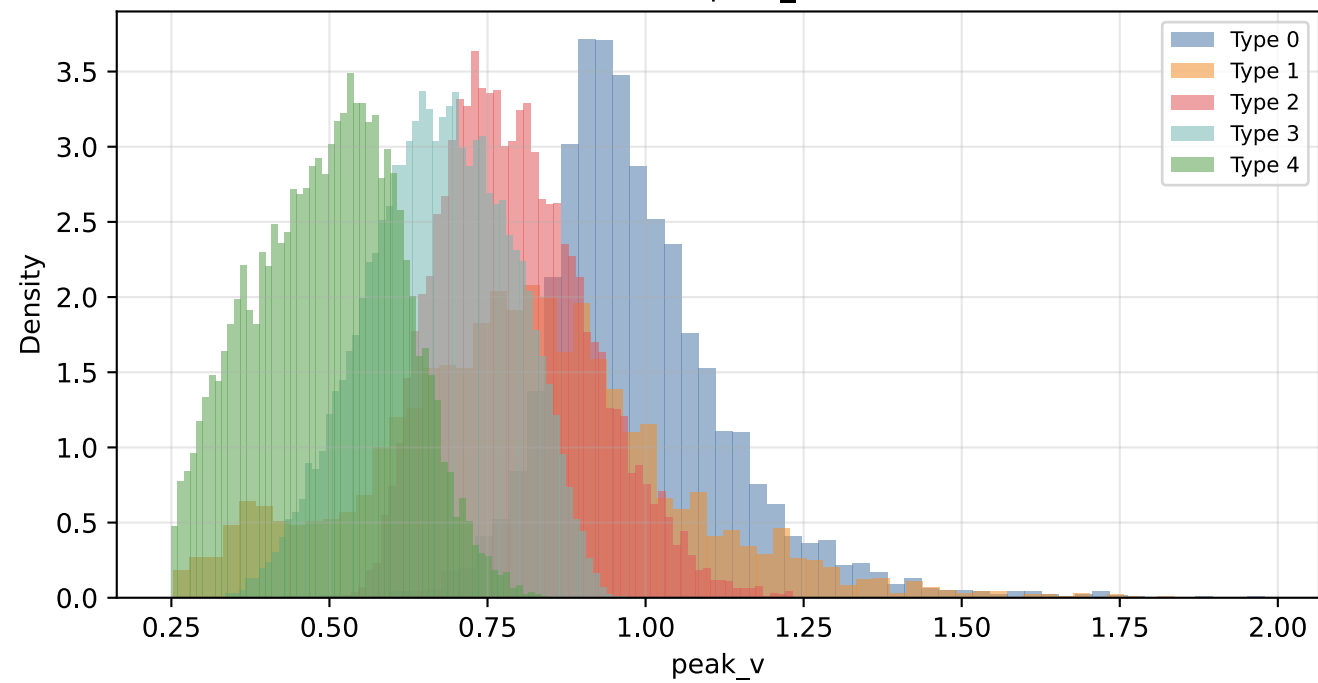

## B — peak\_v

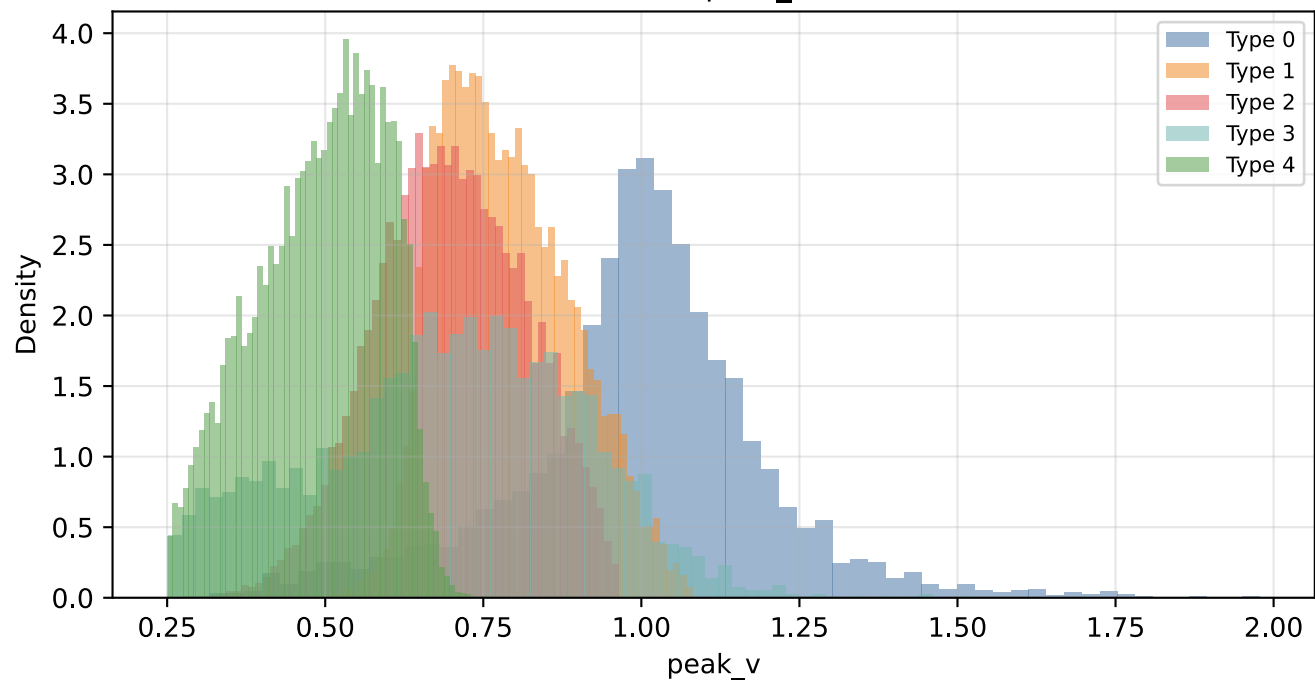

## A — trough\_v

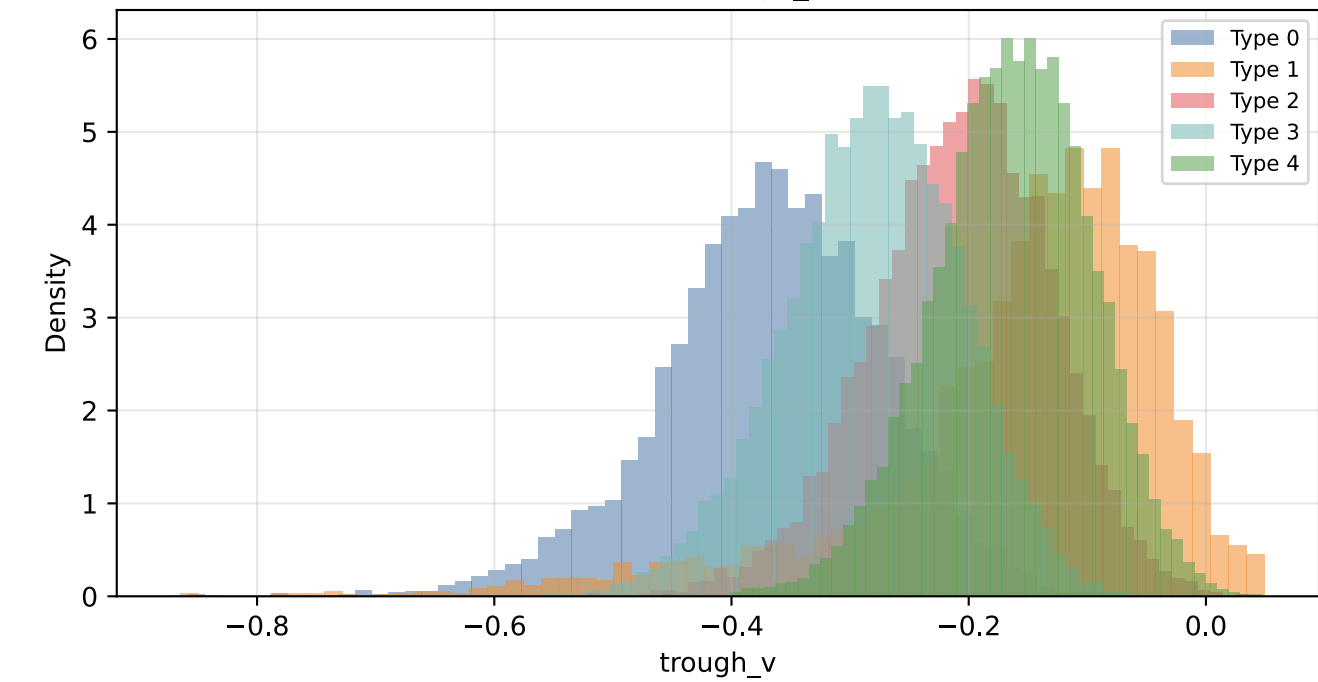

## B — trough\_v

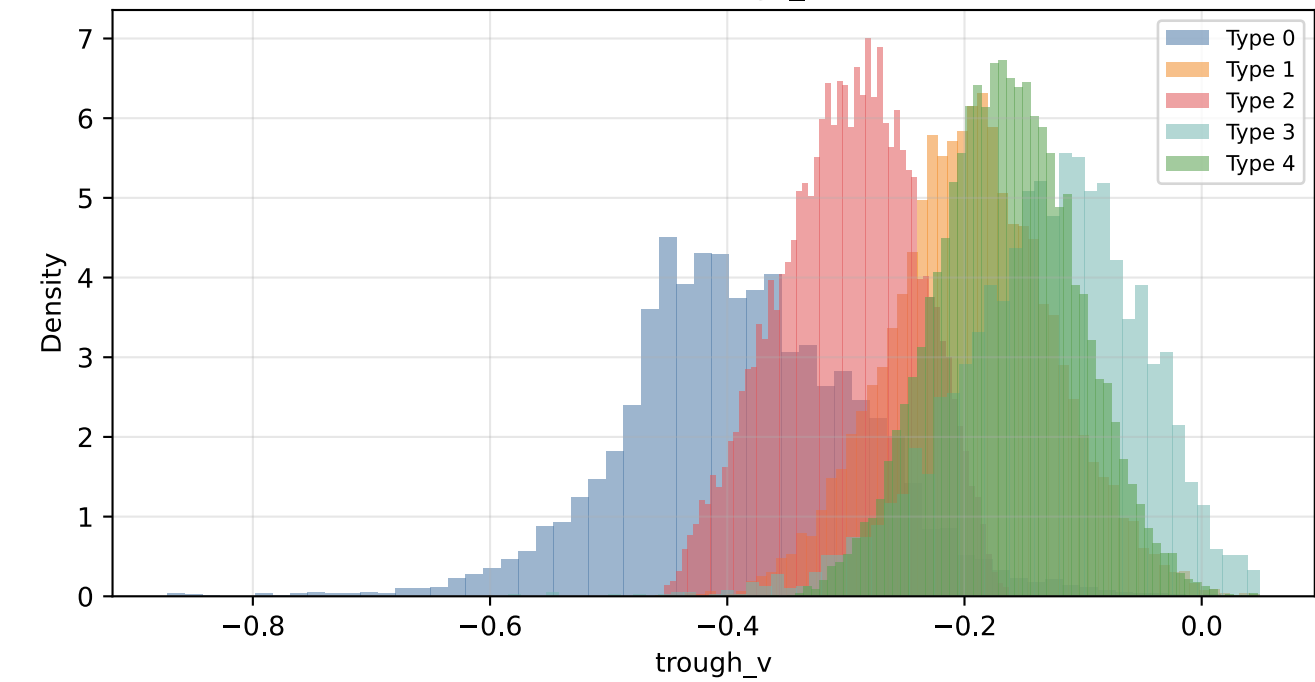

## A — symmetry

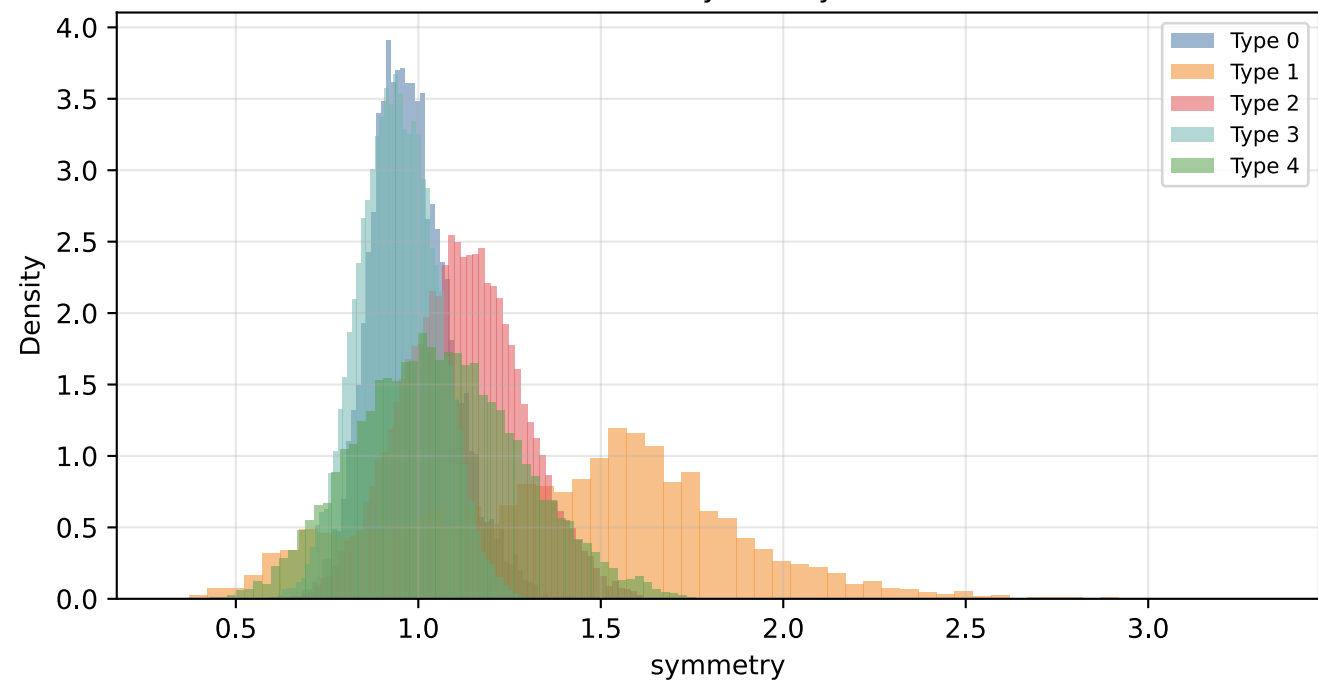

## B — symmetry

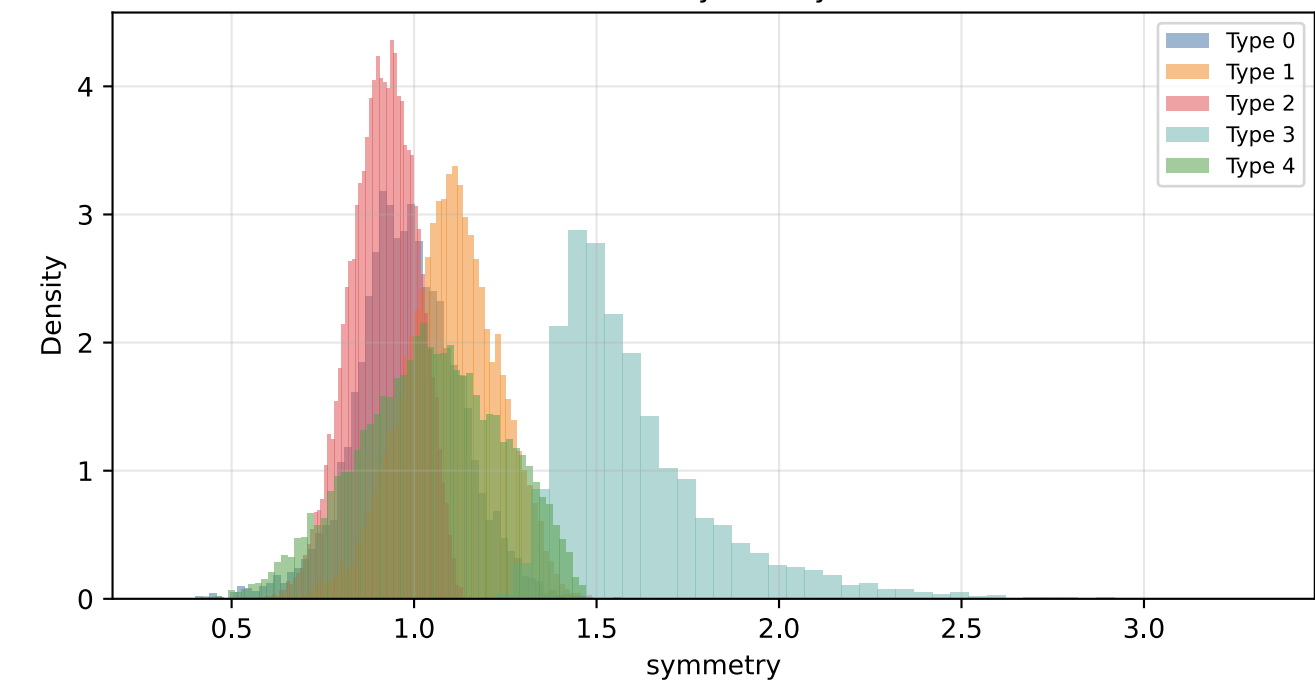

Supplement: Supplementary file 8 [file dc73f5a66830d0efebde7742.pdf]
