# Supplementary material
Source: Research Square preprint supplement (doi:10.21203/rs.3.rs-9759220/v1)

# Heatmap Comparison: A (6 features) vs B (3 features)

A: 6 features (current)

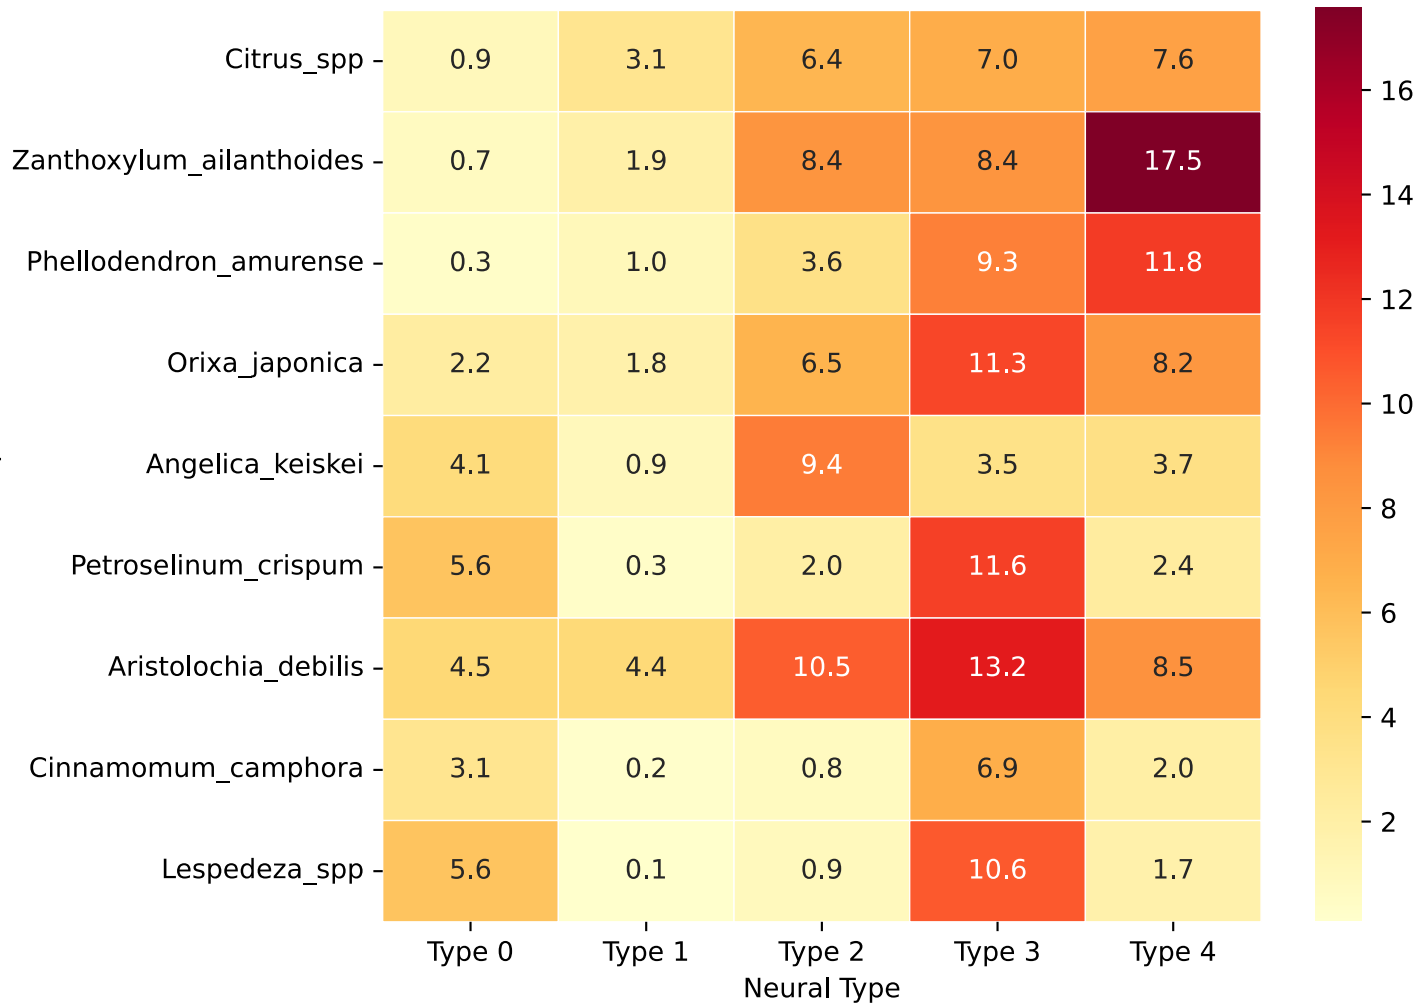

B: 3 features (peak\_v, trough\_v, symmetry)

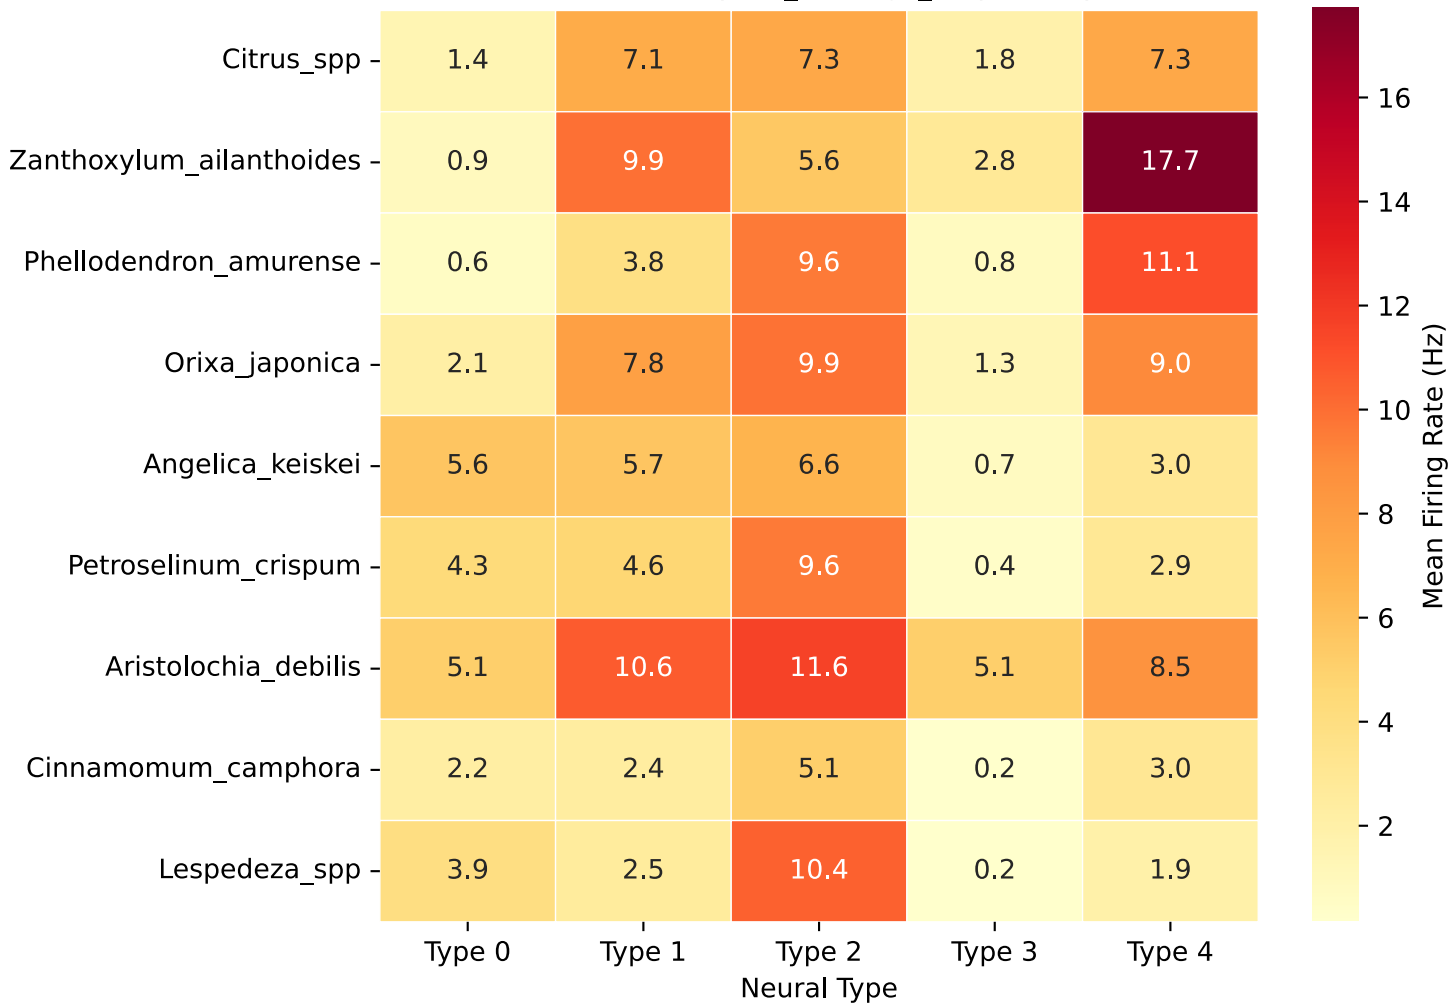

Supplement: Supplementary file 9 [file e28a58ce4ae15312de47bc4c.pdf]
