# Supplementary material
Source: Research Square preprint supplement (doi:10.21203/rs.3.rs-9759220/v1)

**PCA Sensitivity Test: K=5, PCA=3 vs PCA=4**  
(shaded = direction reversal between PCA settings)

**Host vs Non-host**

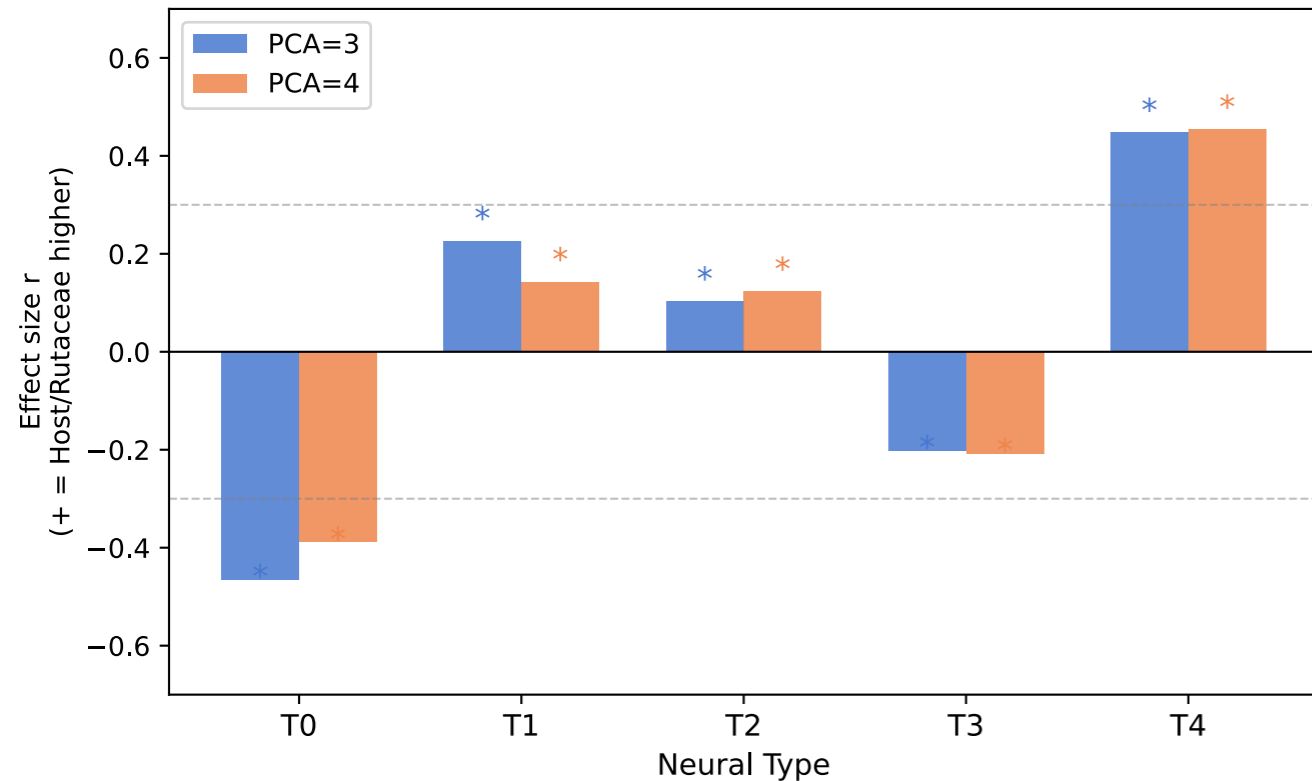

**Rutaceae vs Non-Rutaceae**

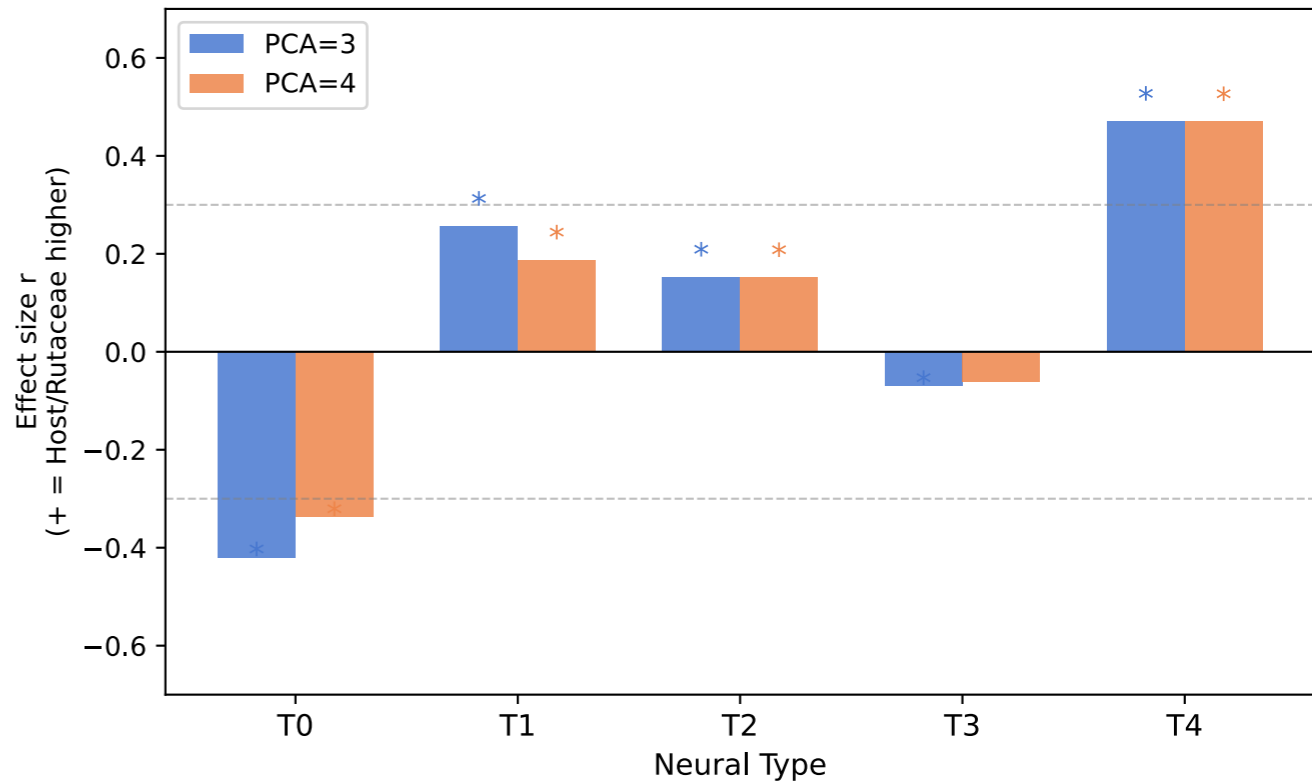

Supplement: Supplementary file 10 [file e29519576298940ae4521974.pdf]
