# Supplementary material
Source: Research Square preprint supplement (doi:10.21203/rs.3.rs-9759220/v1)

r values comparison (Host vs Non-host, FDR corrected)

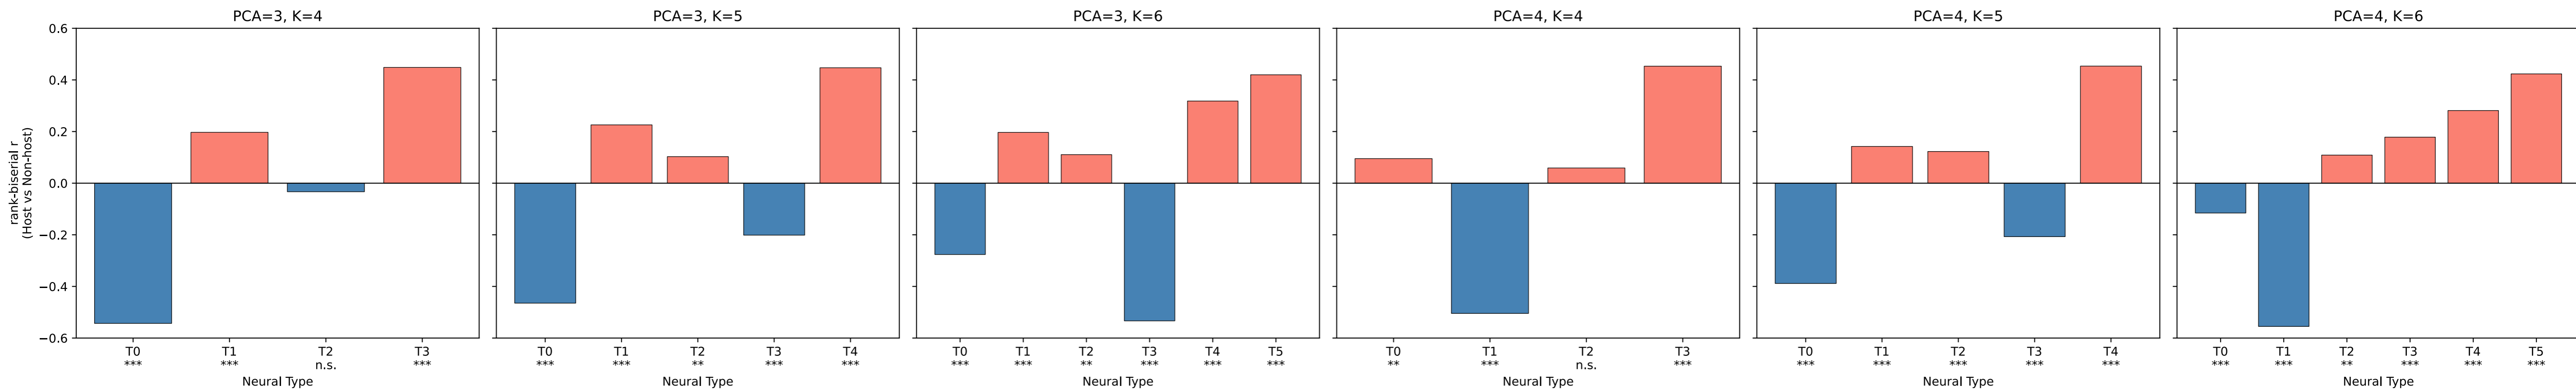

Supplement: Supplementary file 1 [file 0a12bd389167ab00a8923e91.pdf]

Cross-tabulation A vs B (ARI = 0.407)

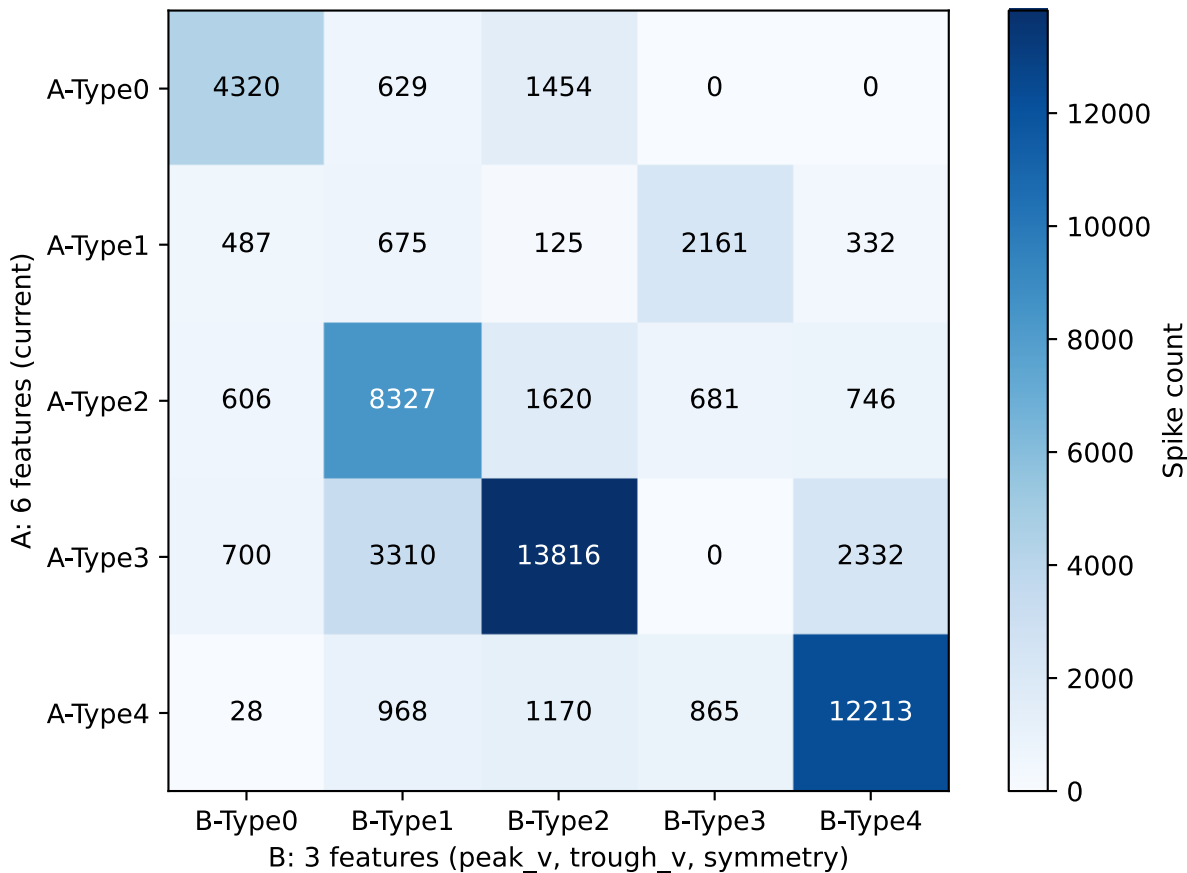

Supplement: Supplementary file 2 [file 2b07f5af691fb2376ba3ecc2.pdf]

# Feature Set Sensitivity: BIC/AIC Comparison

## BIC Score by Feature Set

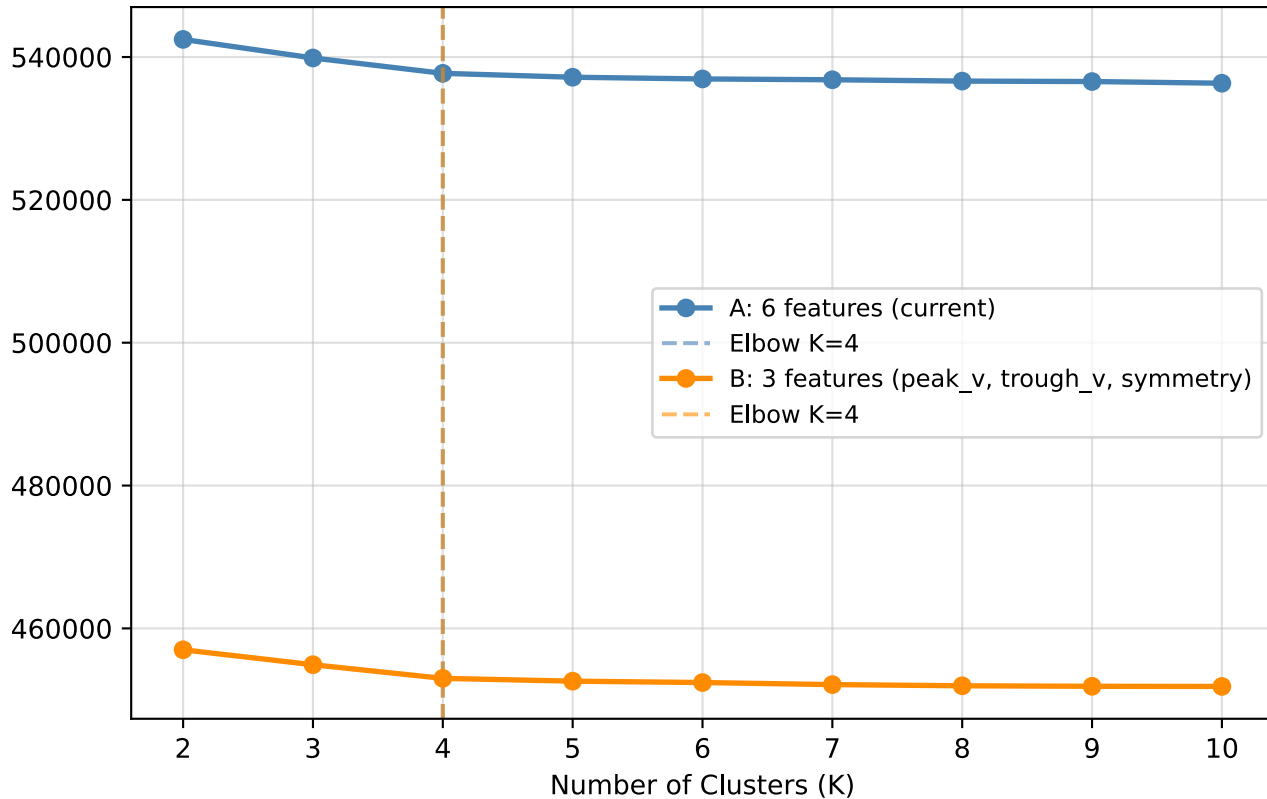

## AIC Score by Feature Set

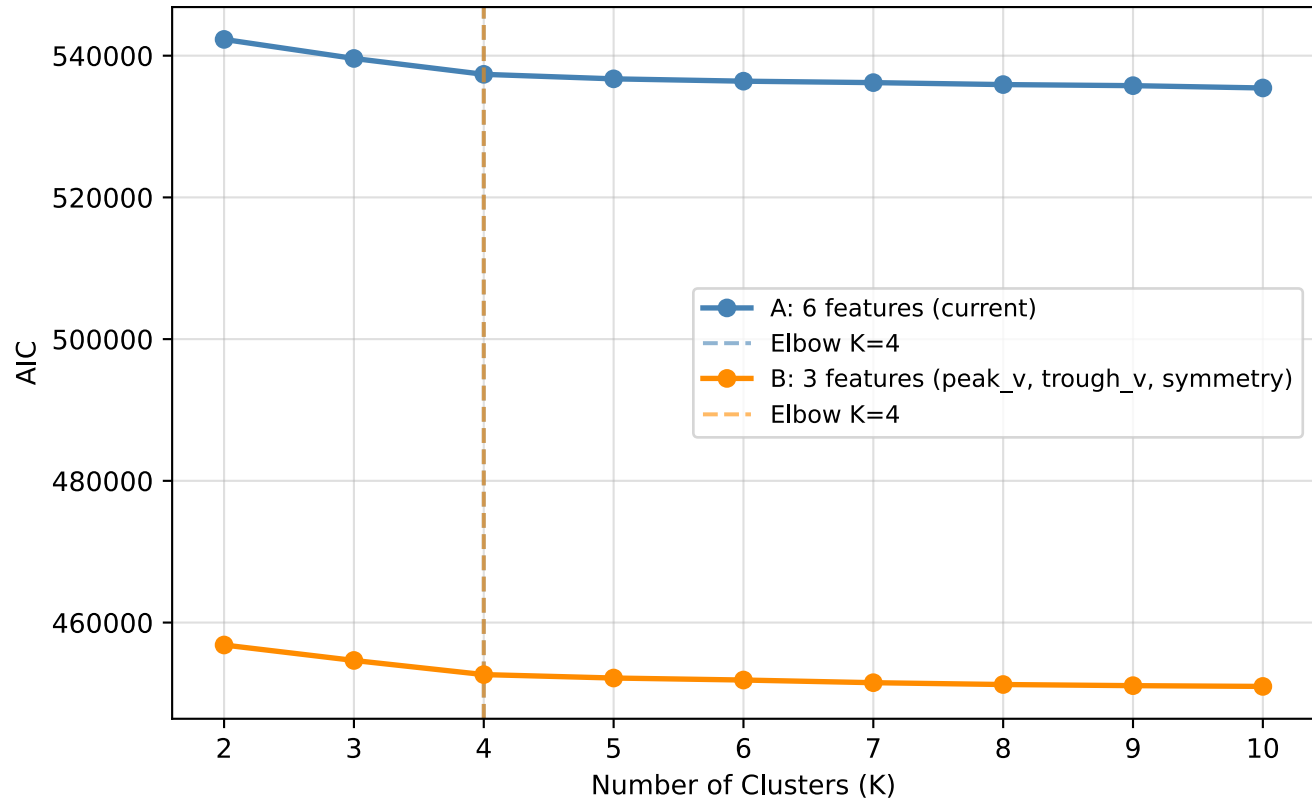

Supplement: Supplementary file 6 [file 7467797d7f943d3d48ad93f0.pdf]

# Neural Templates: A (6 features) vs B (3 features)

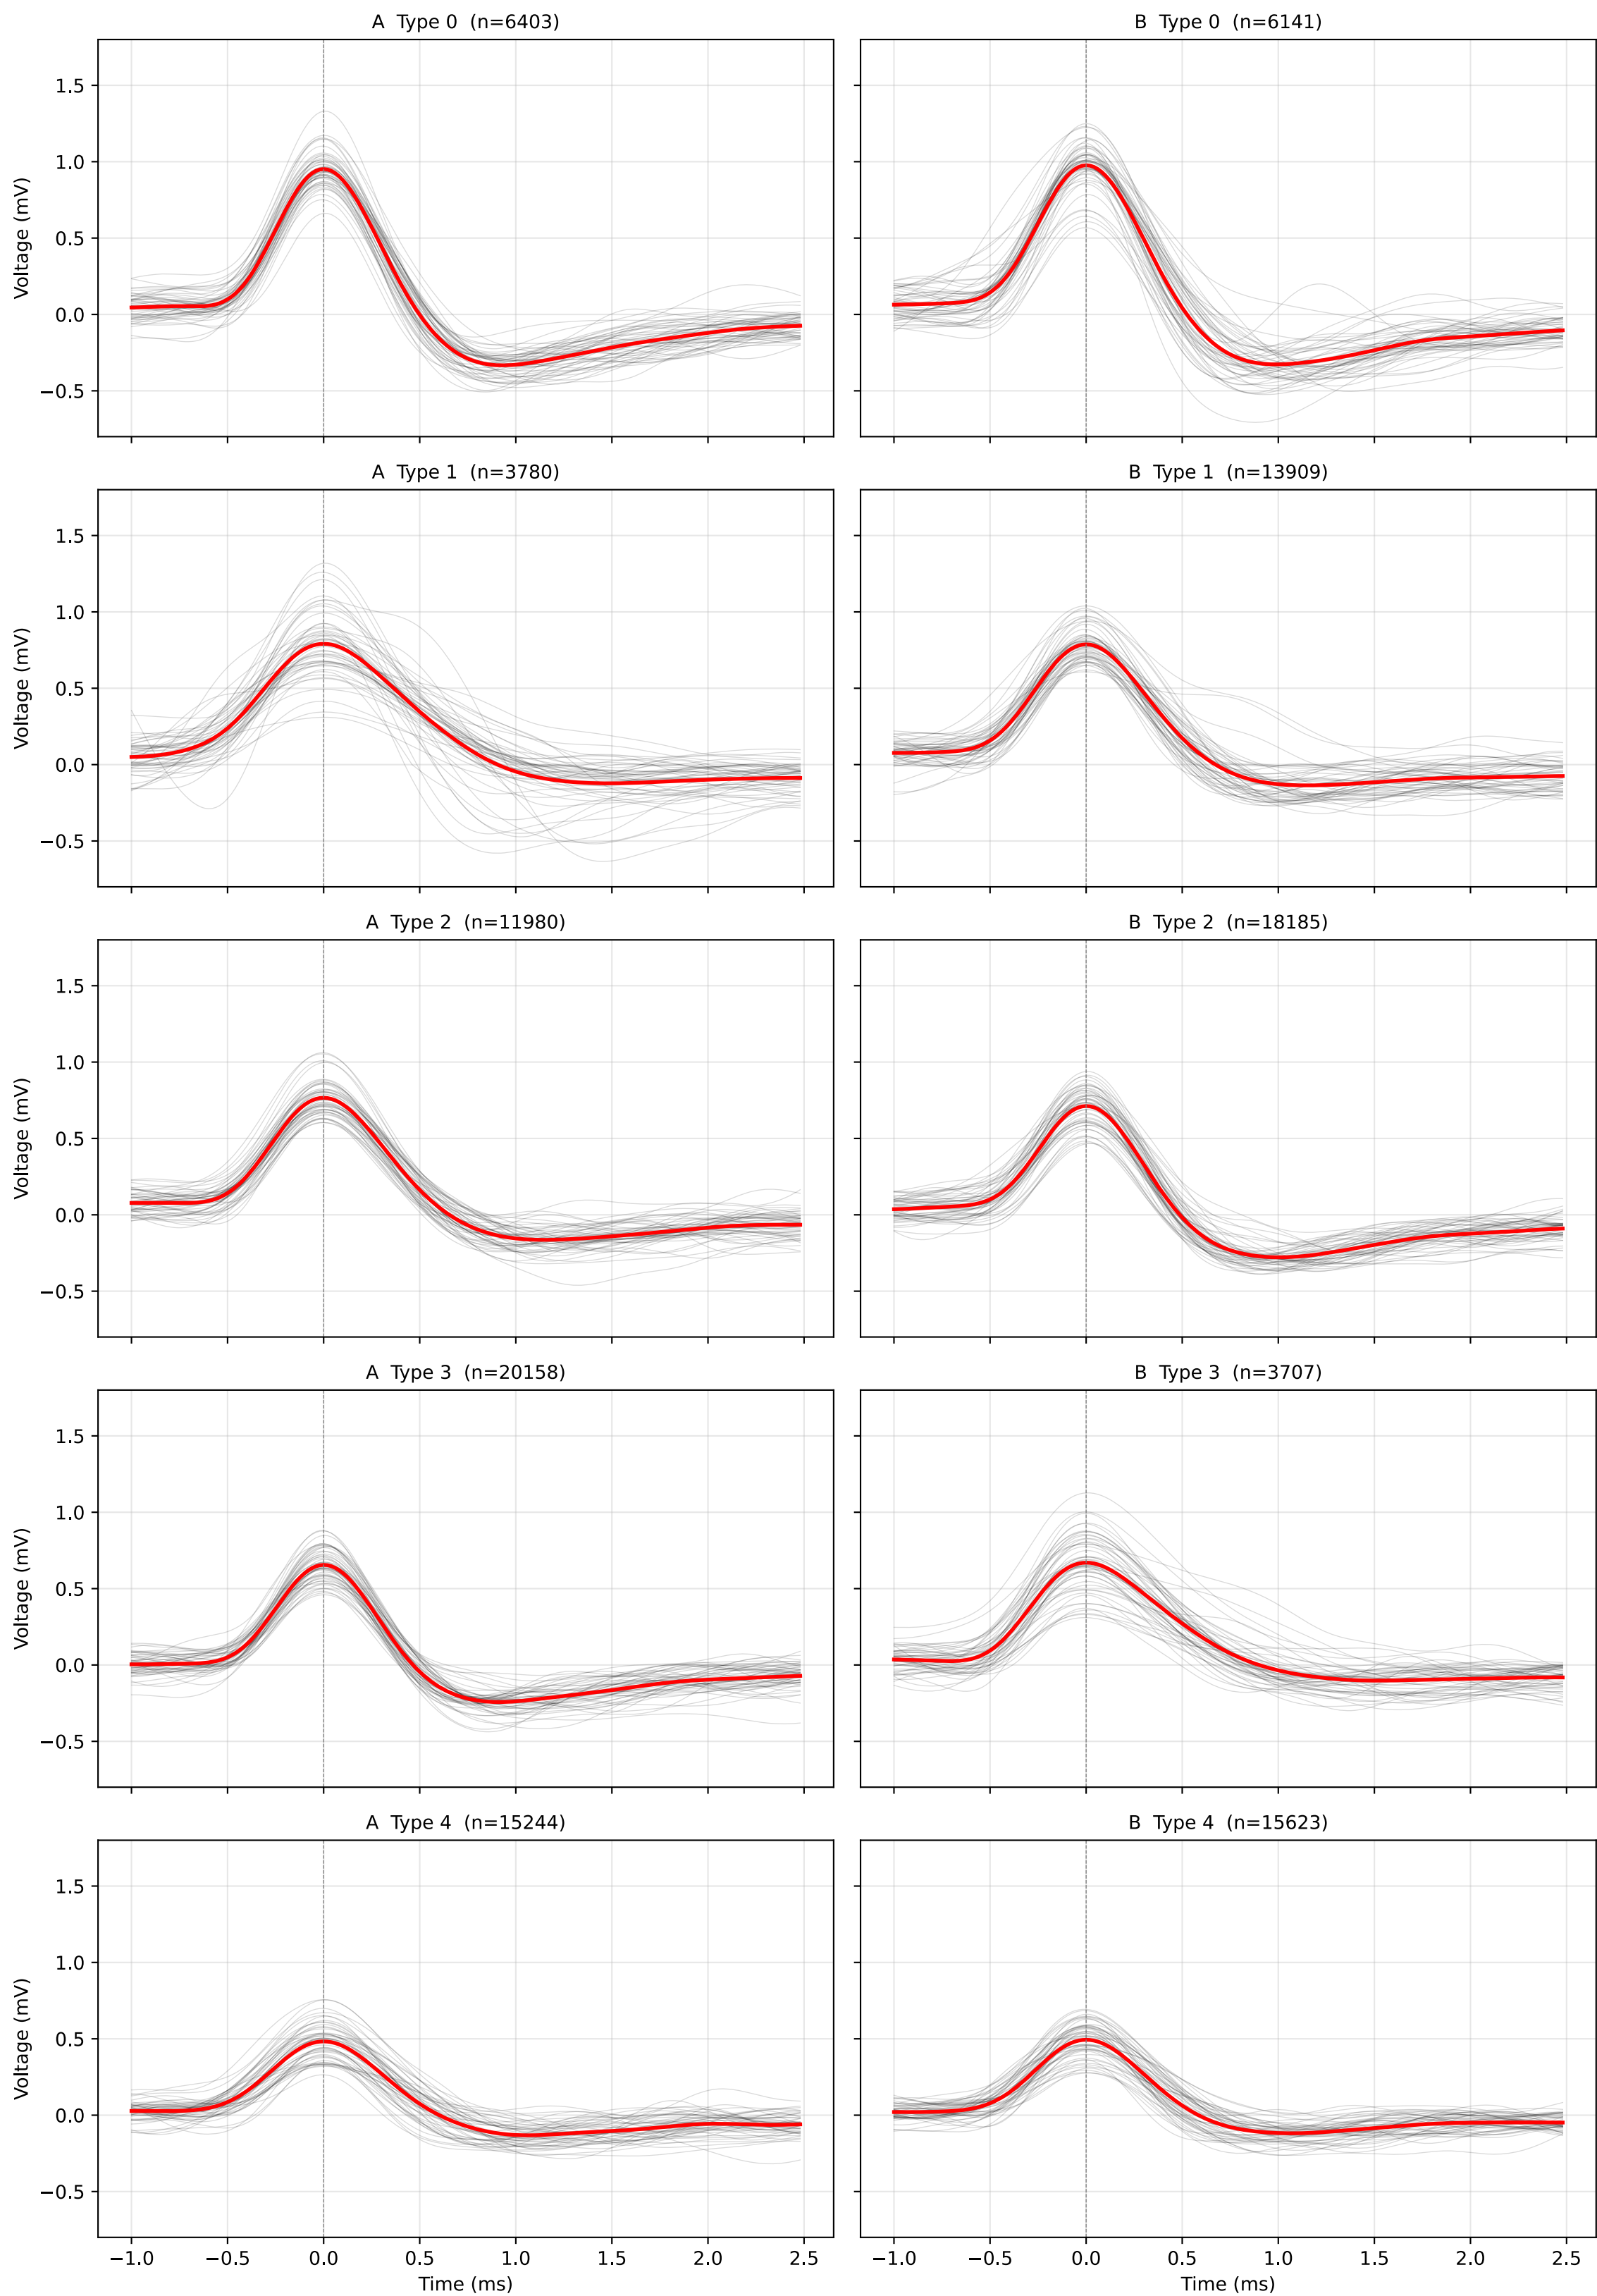

Supplement: Supplementary file 7 [file 94935b78c2a2aa45484964ae.pdf]
